# Supplementary material
Source: Elsevier journal article supplement (https://comptes-rendus.academie-sciences.fr/chimie/article/10.1016/j.crci.2006.06.011/file/attach/mmc1.pdf)

Revised version submitted to *Comptes rendus Chimie, Académie des sciences, Paris*

## Supplementary Material for:

# A Novel Pseudo-2D Structural Motif in an Anionic Copper(II) Dicyanamide Coordination Polymer

*John A. SCHLUETER,<sup>a\*</sup> Jamie L. MANSON<sup>b</sup> and Urs GEISER<sup>a</sup>*

<sup>a</sup> Materials Science Division, Argonne National Laboratory, Argonne, IL 60439-4831, USA.

<sup>b</sup> Department of Chemistry and Biochemistry, Eastern Washington University, Cheney, WA  
99004, USA.

e-mail: JASchlueter@anl.gov; phone: (630)252-3588; fax: (630)252-9151

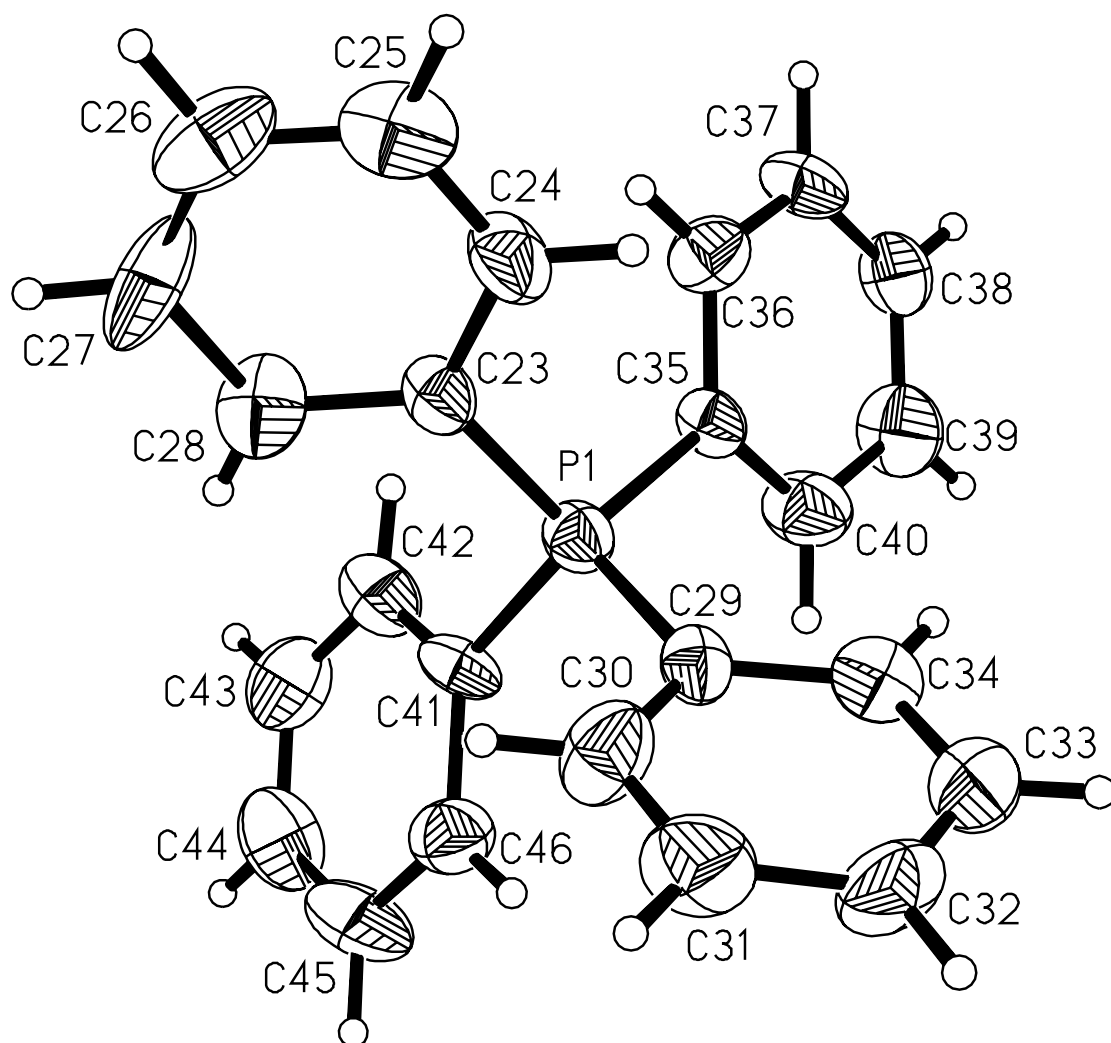

**Figure S1.** Atomic numbering scheme of the  $\text{PPh}_4^+$  cation associated with phosphorous atom P1 in the  $(\text{PPh}_4)_3[\text{Cu}_4(\text{dca})_{11}]$  salt. Thermal ellipsoids are drawn at the 50% probability level.





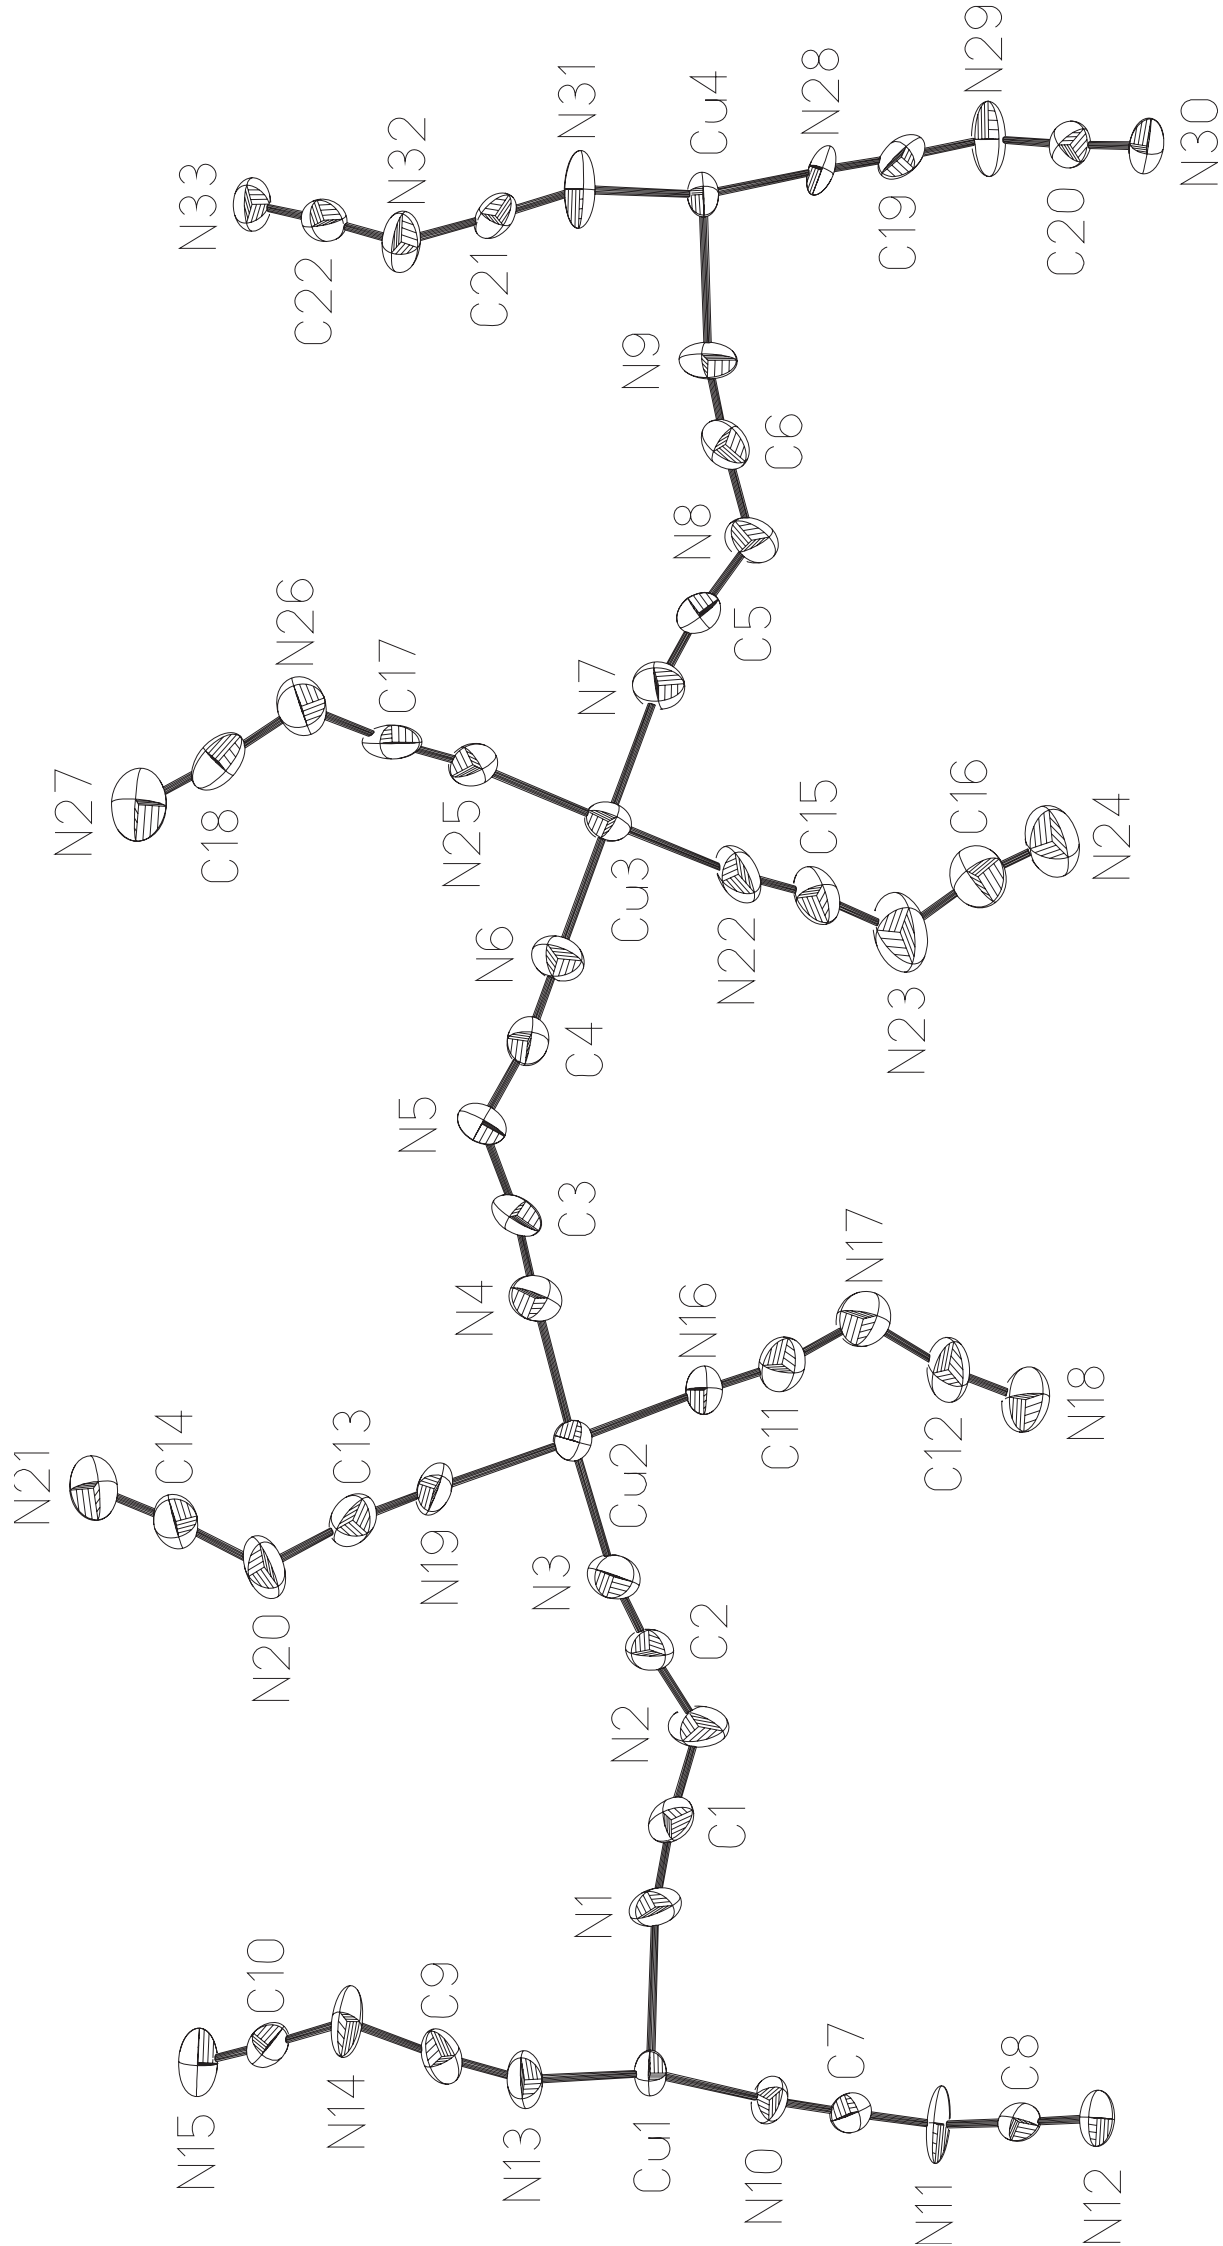

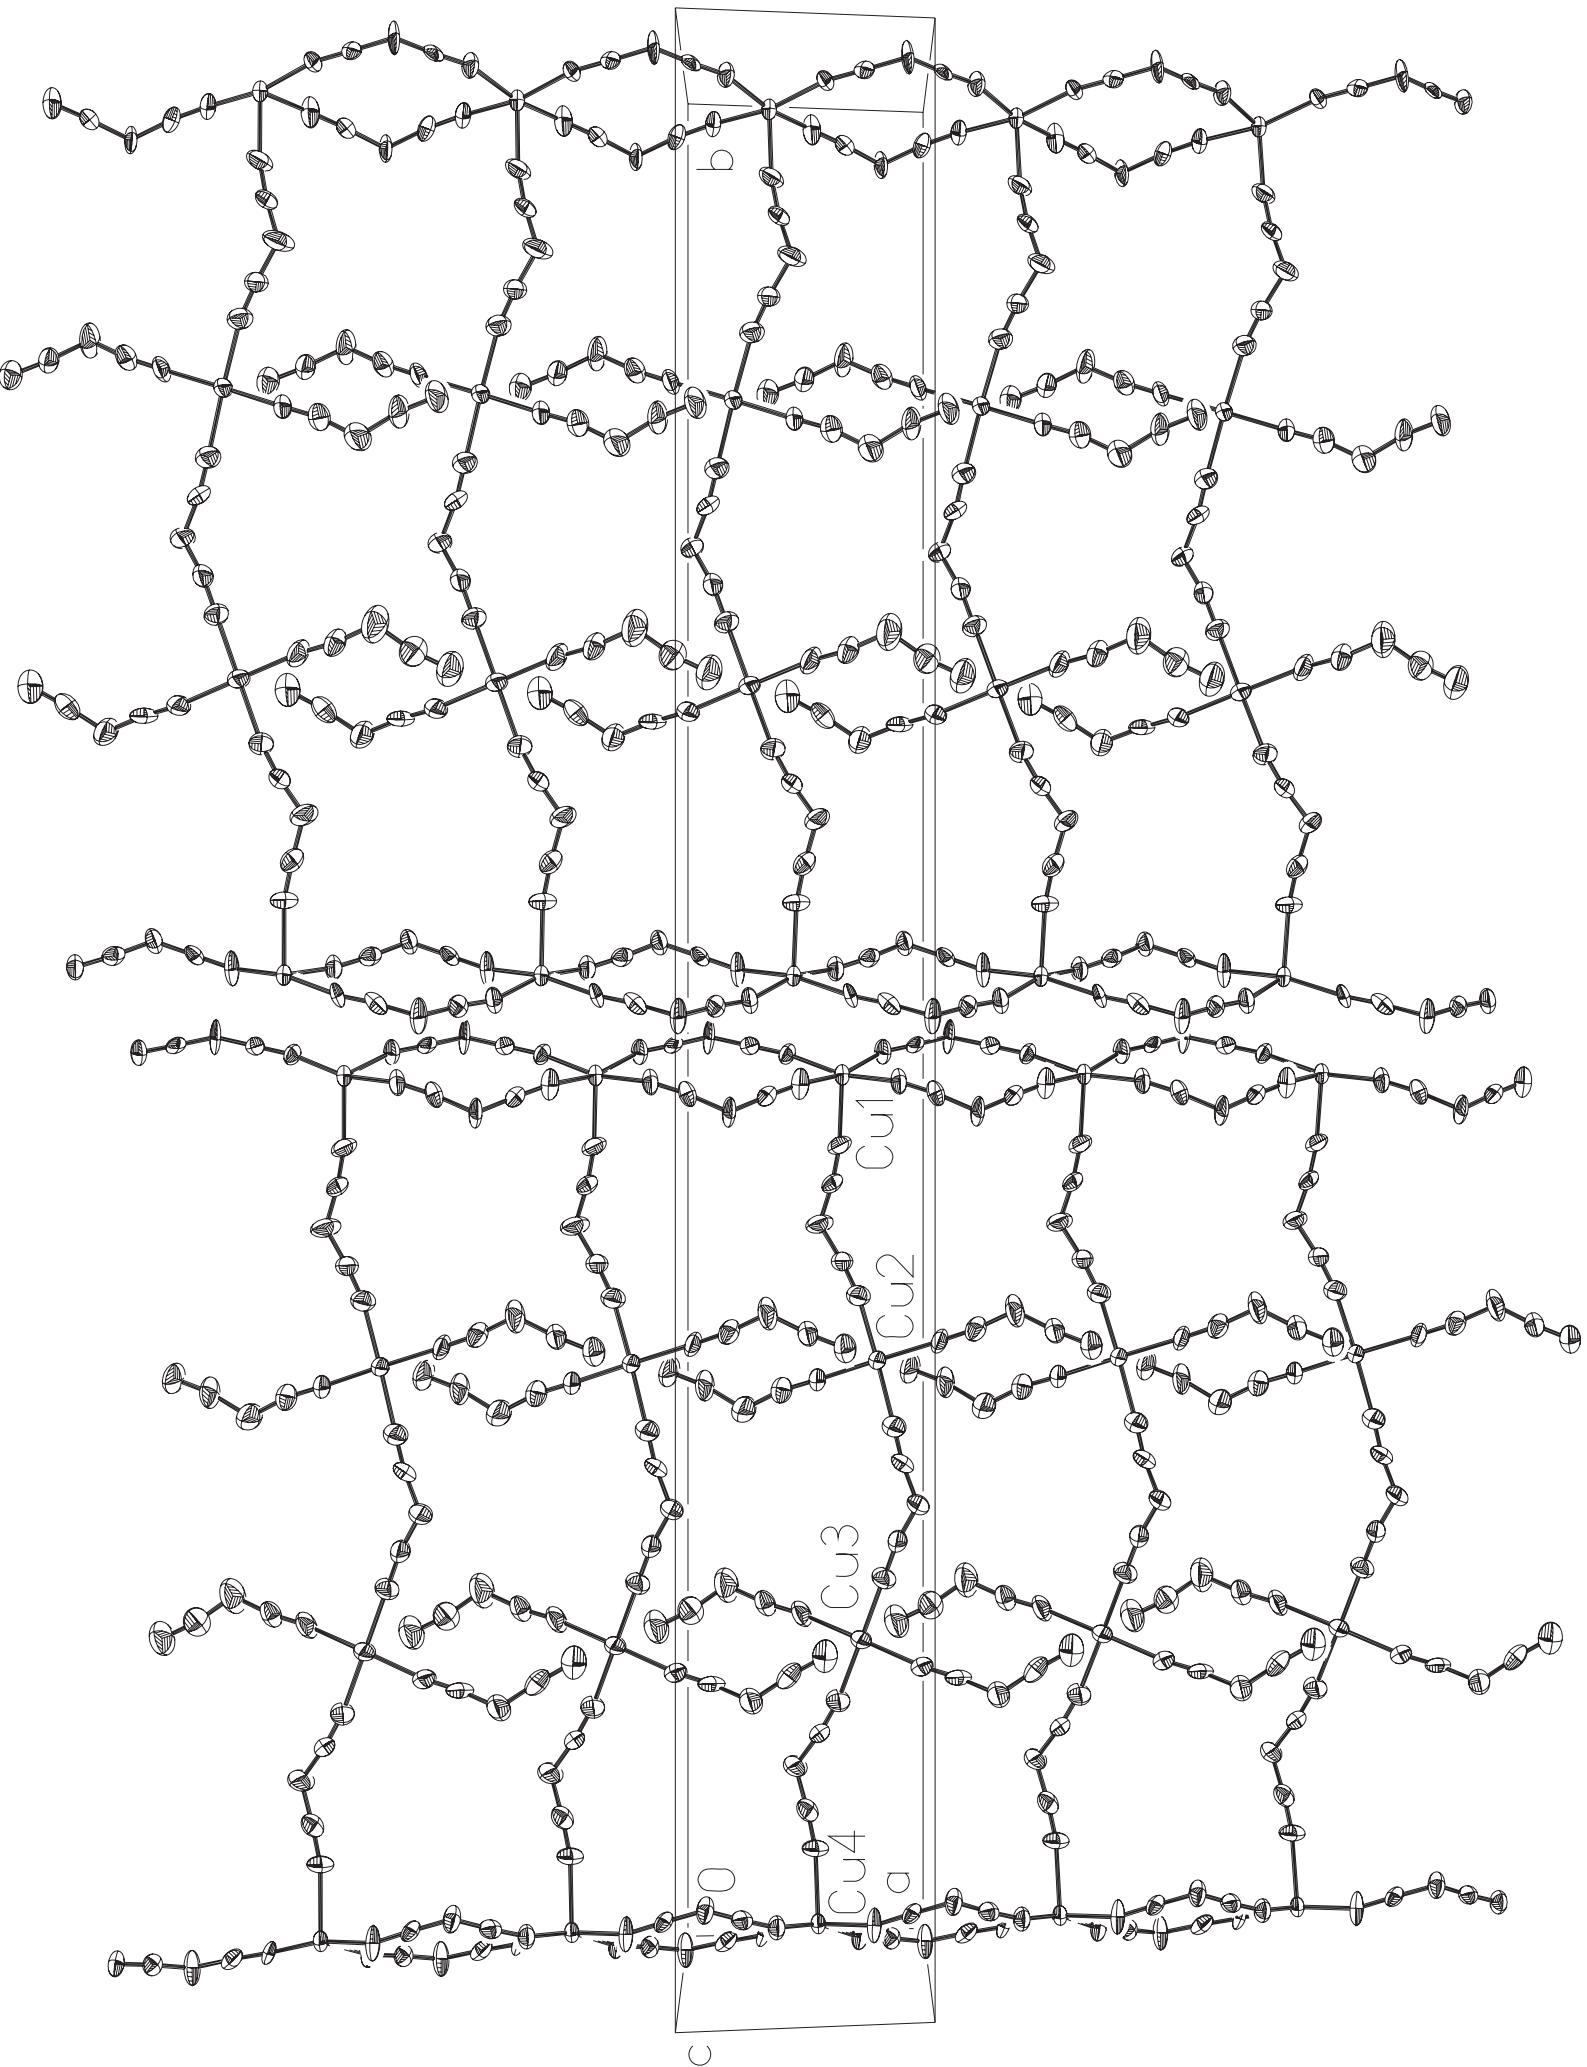

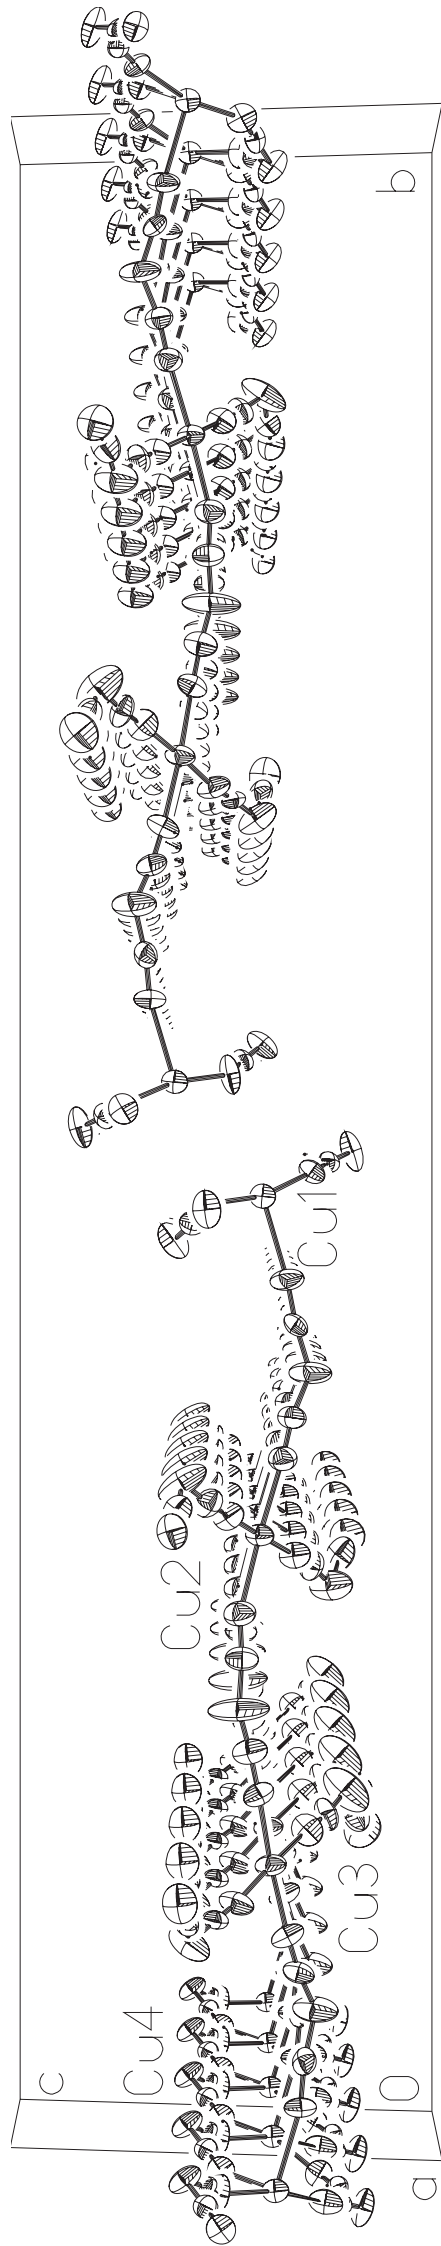

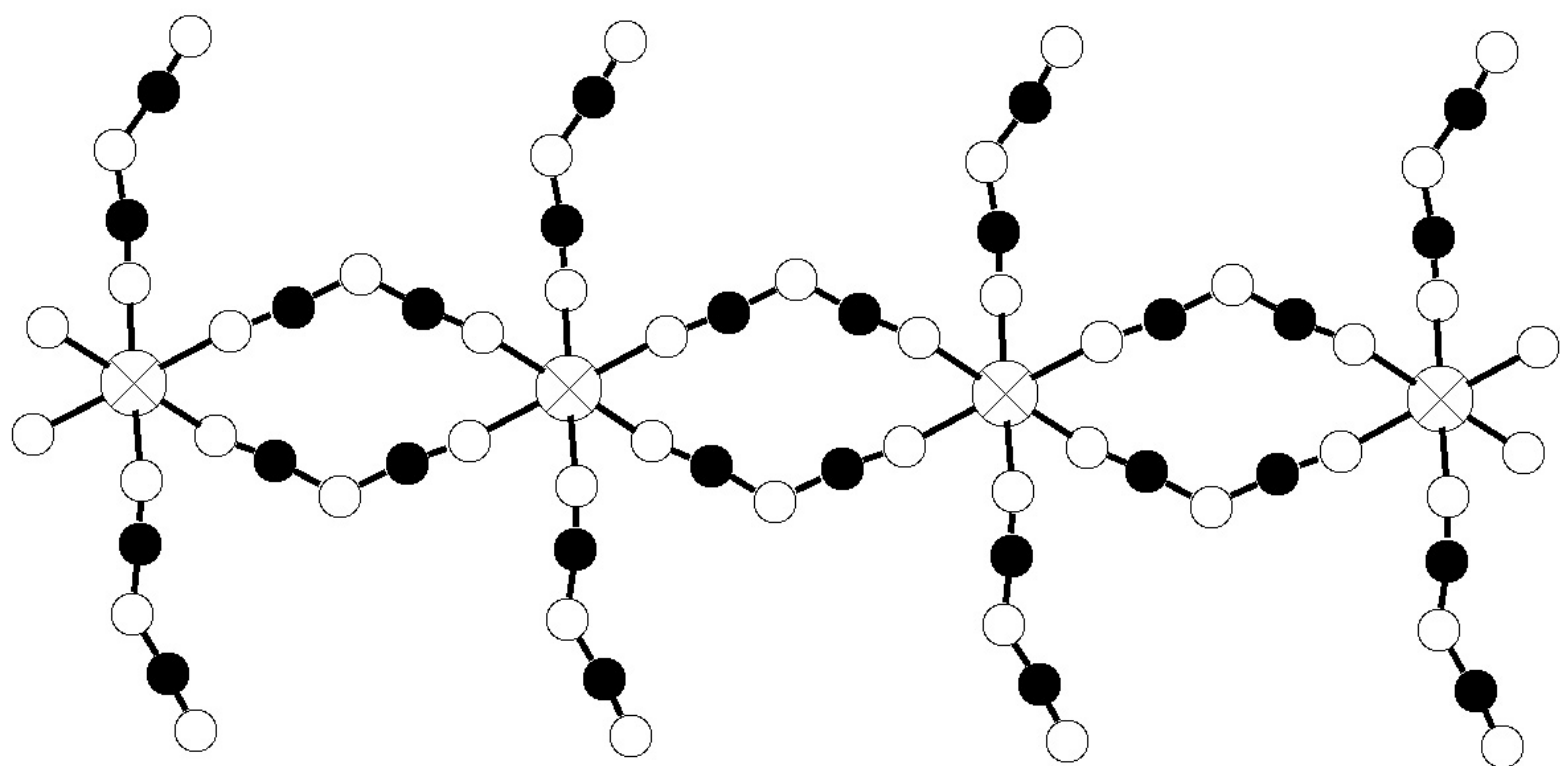



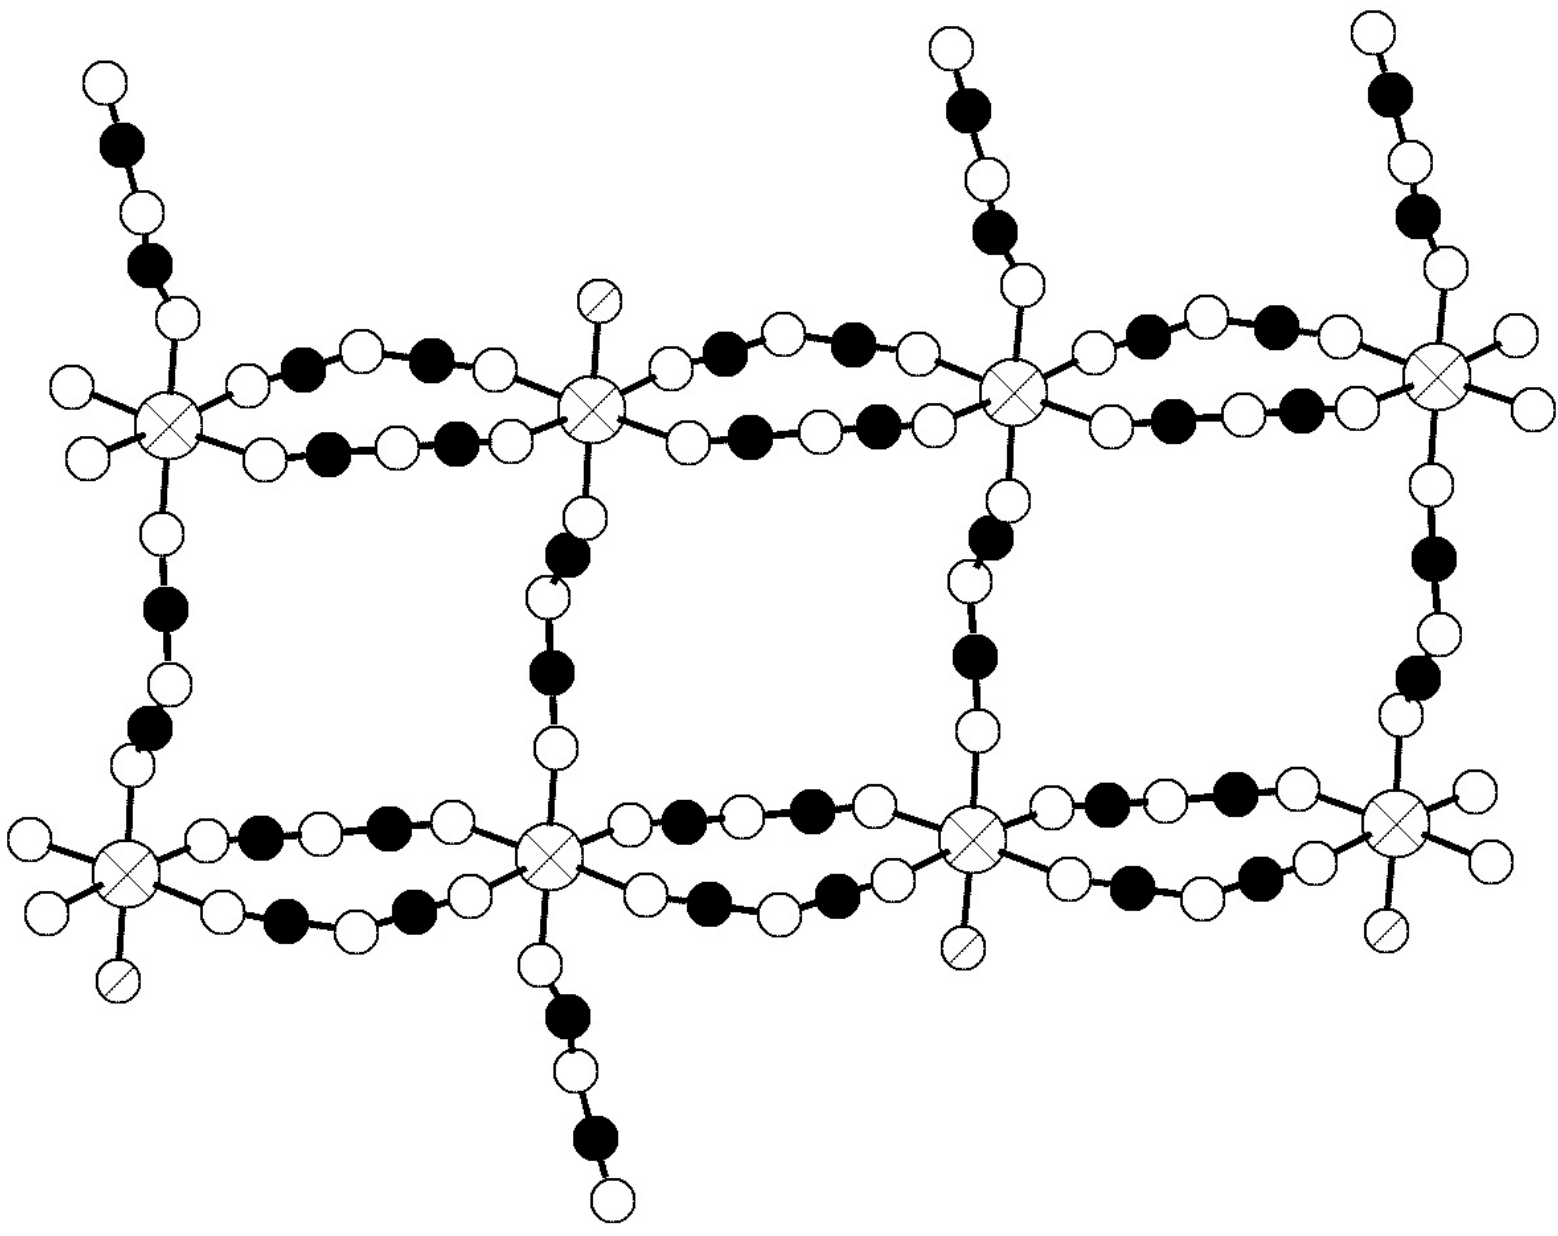

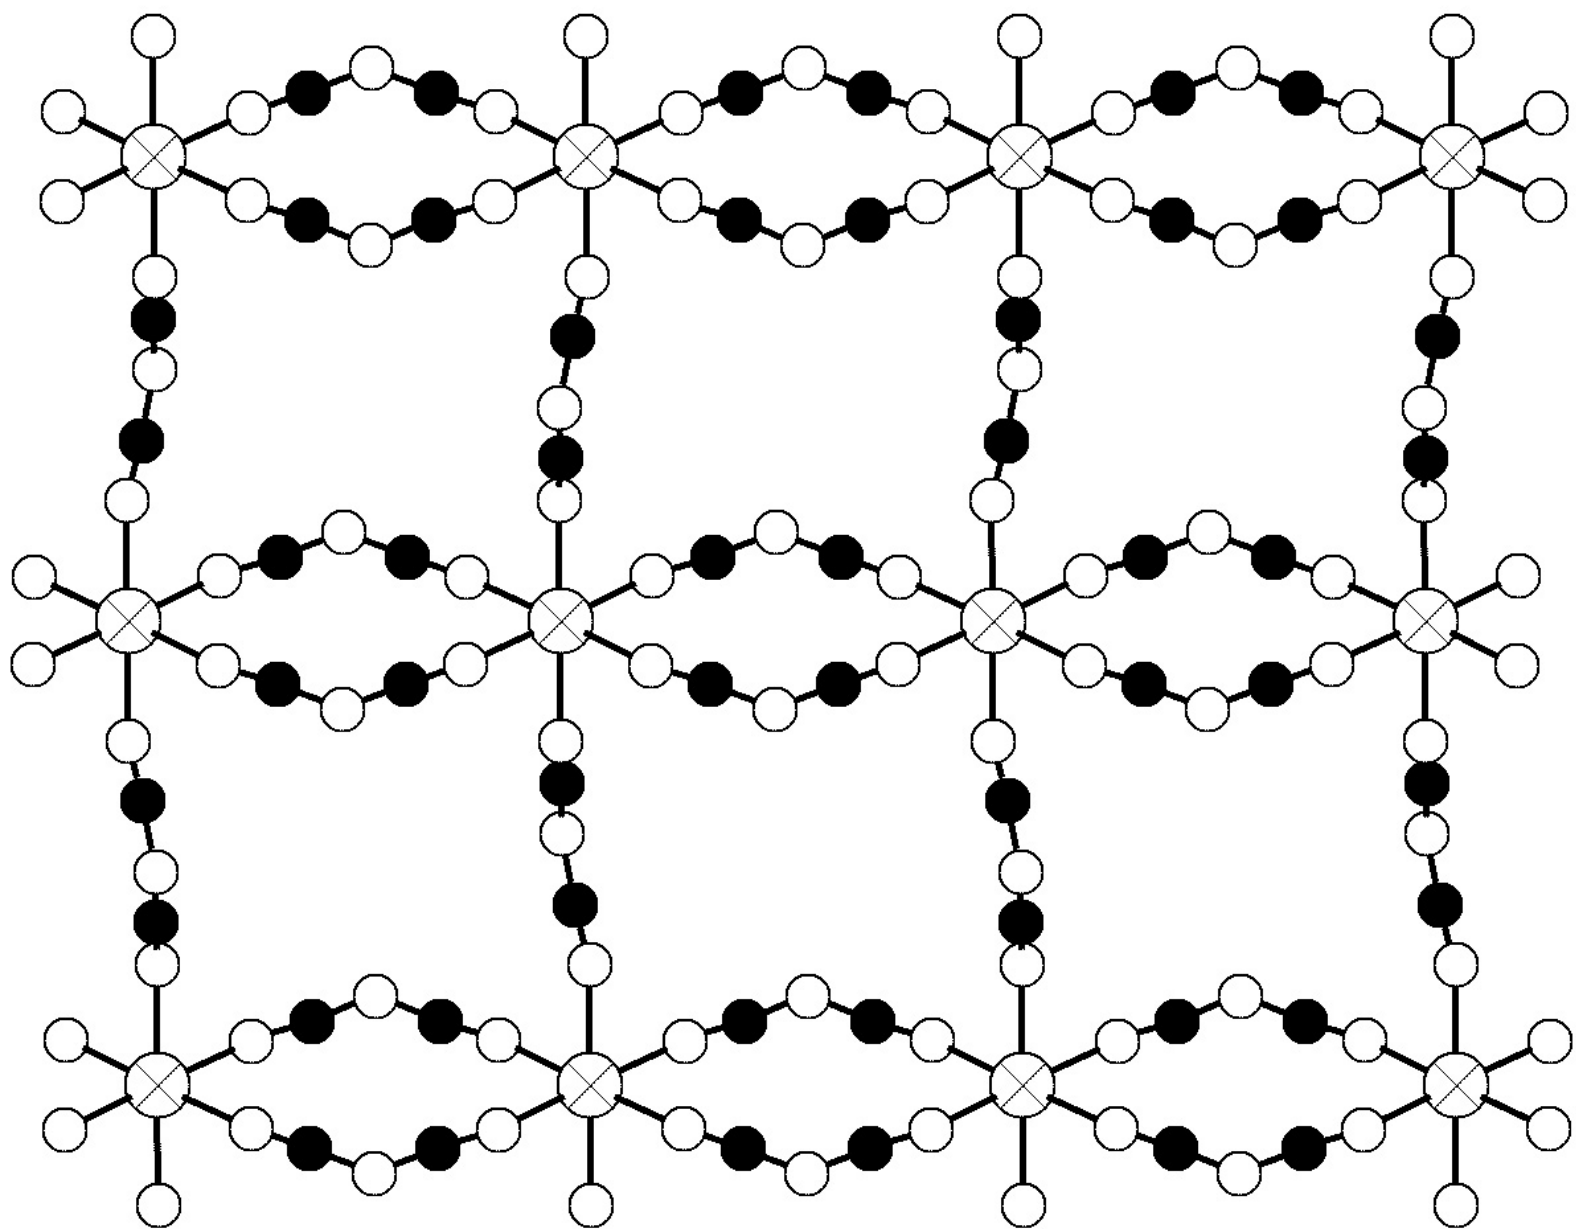

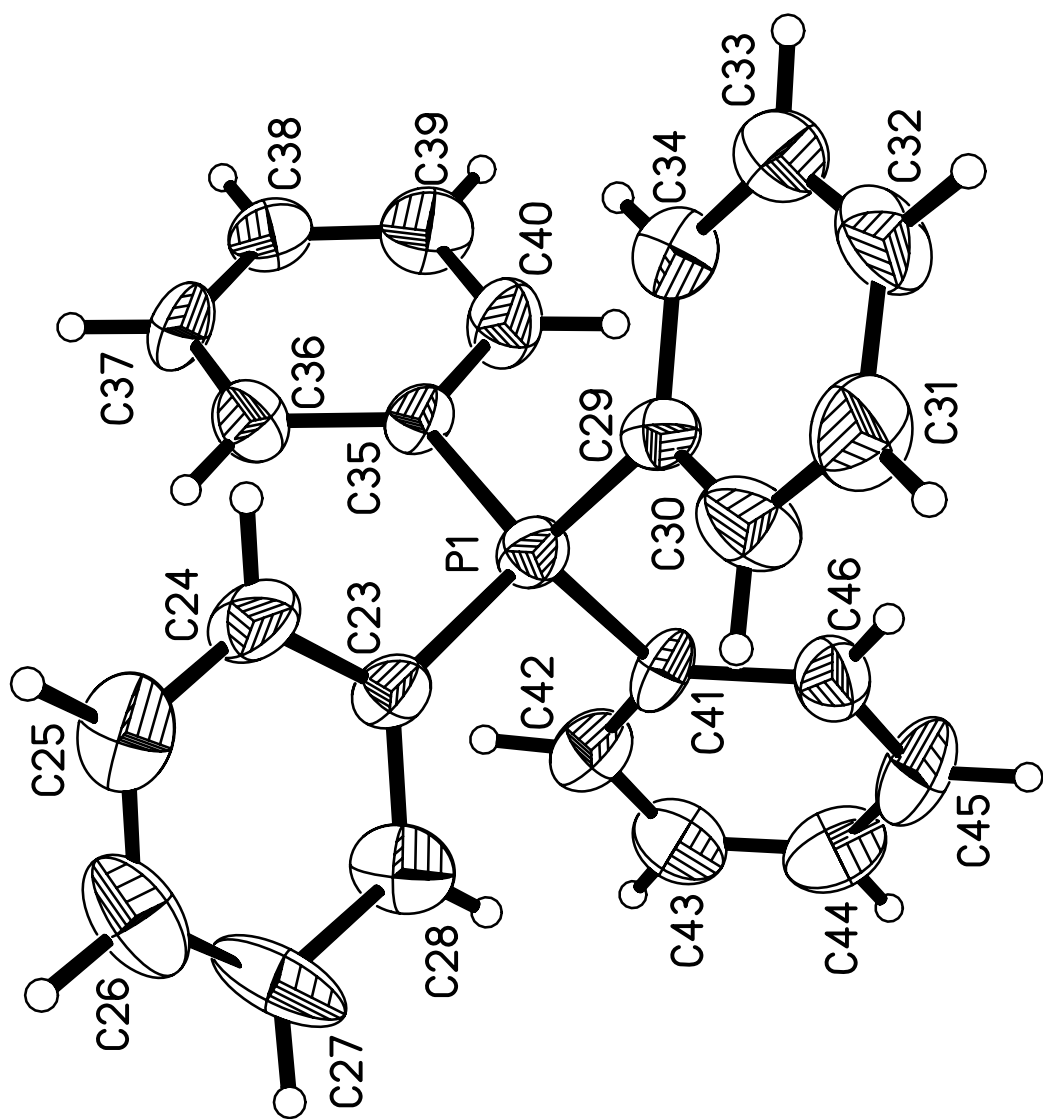

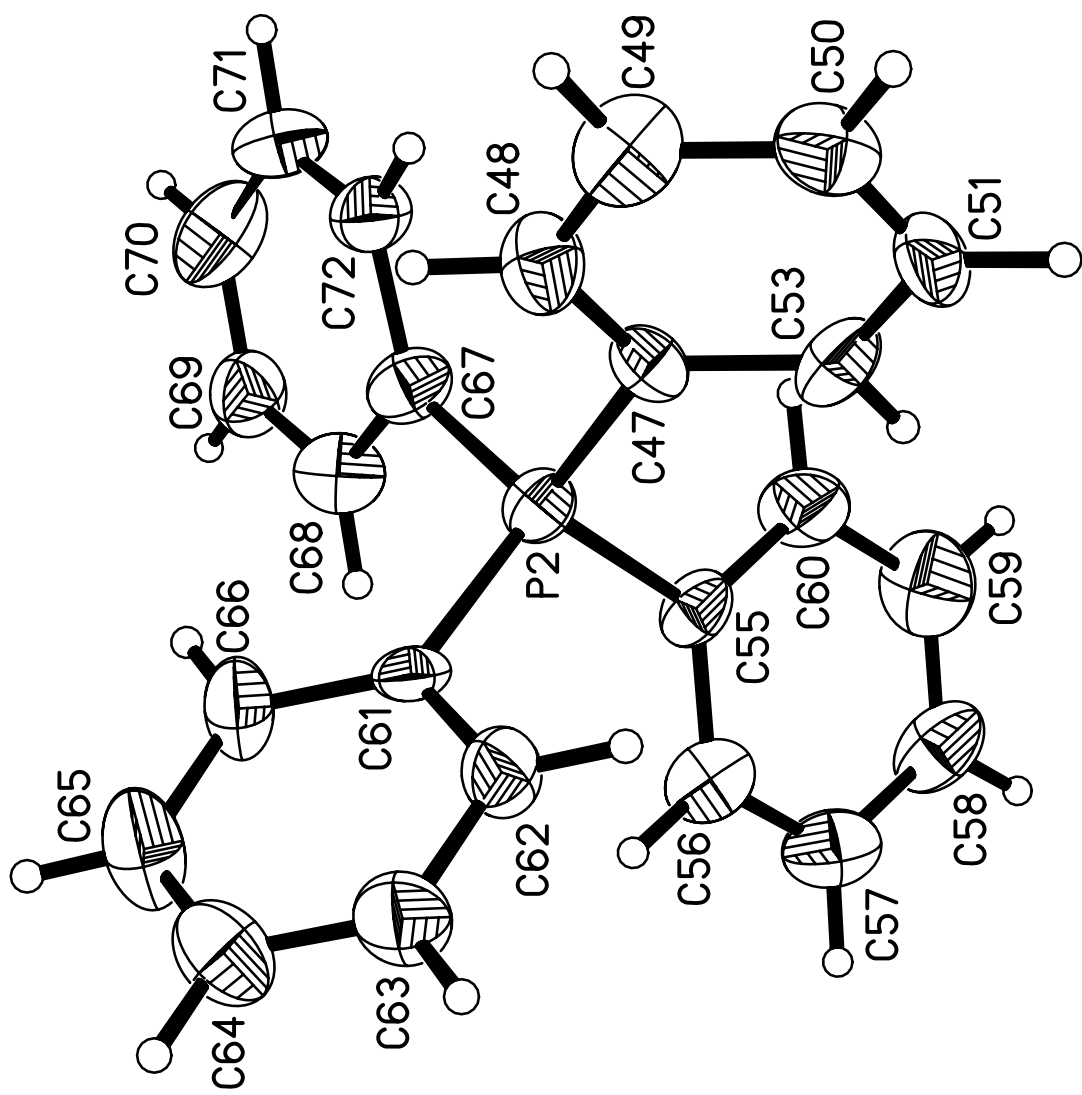

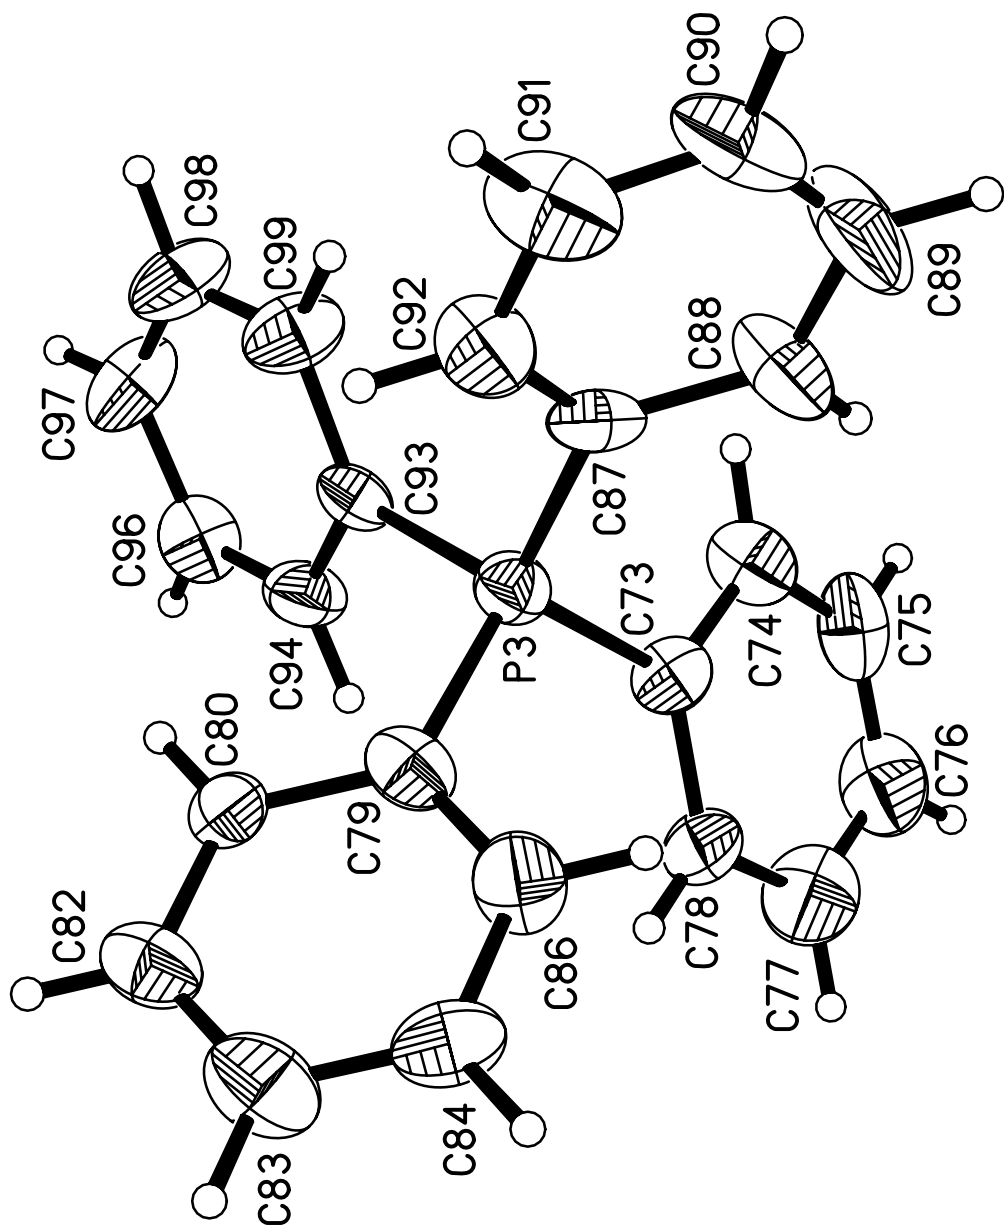

Supplement: mmc1 [file mmc1.pdf]
